# Supplementary material
Source: MDPI journal article supplement (https://www.mdpi.com/2076-3417/13/23/12702)
Supplement: s1 [file s1 › applsci-2704523-supplementary.pdf]

# Supplementary Materials: Manganese-cobalt spinel nanoparticles anchored on carbon nanotubes as bi-functional catalysts for oxygen reduction and oxygen evolution reactions

## Supplementary Figures

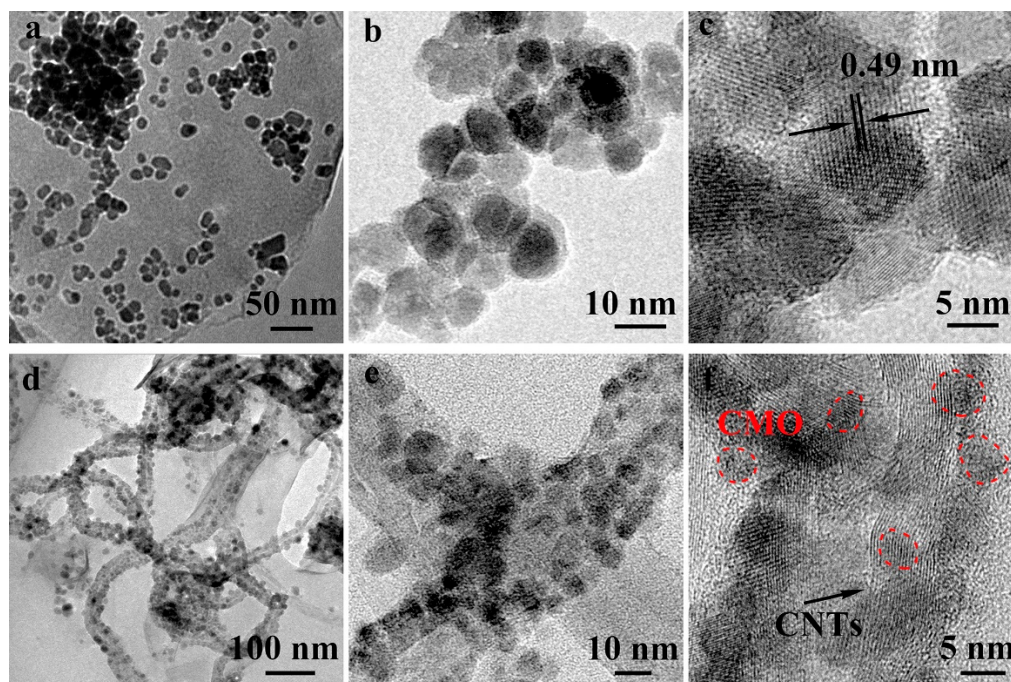

Figure S1. TEM images of (a-c) CoMn<sub>2</sub>O<sub>4</sub> nanoparticles, and (d-f) CoMn<sub>2</sub>O<sub>4</sub>-CNTs nanocomposites.

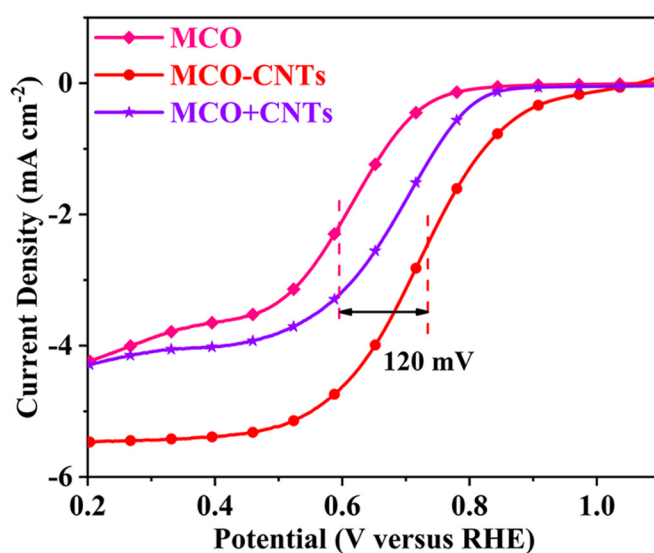

Figure S2. ORR polarization curves

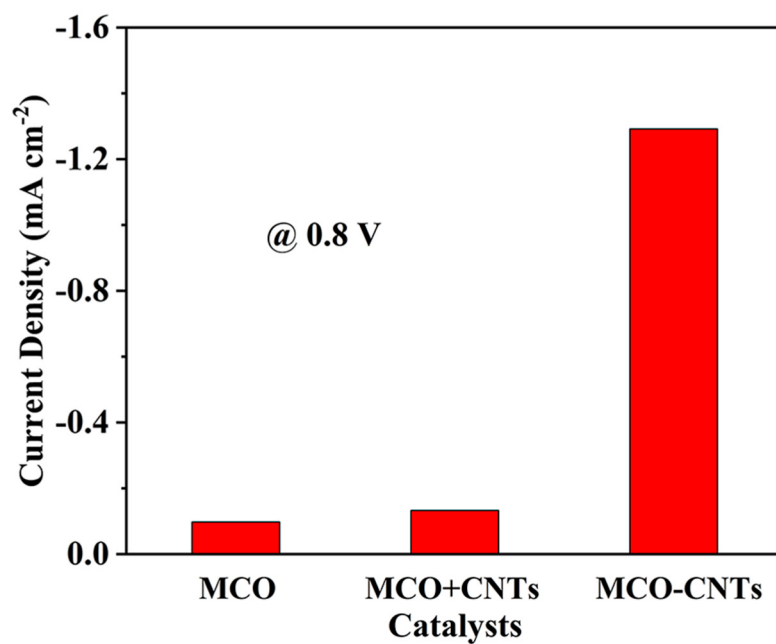

**Figure S3.** The current density at the electrode potential of 0.8 V vs. RHE of MnCo<sub>2</sub>O<sub>4</sub>, MnCo<sub>2</sub>O<sub>4</sub>-CNTs and CoMn<sub>2</sub>O<sub>4</sub>+CNTs with the rotation of 1600 rpm.

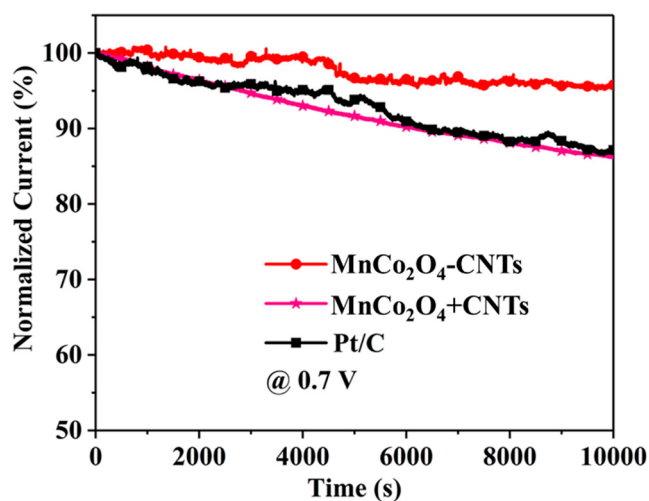

**Figure S4.** Chronoamperometric curves of MnCo<sub>2</sub>O<sub>4</sub>-CNTs, MnCo<sub>2</sub>O<sub>4</sub>+CNTs and Pt/C with the rotation of 1600 rpm.

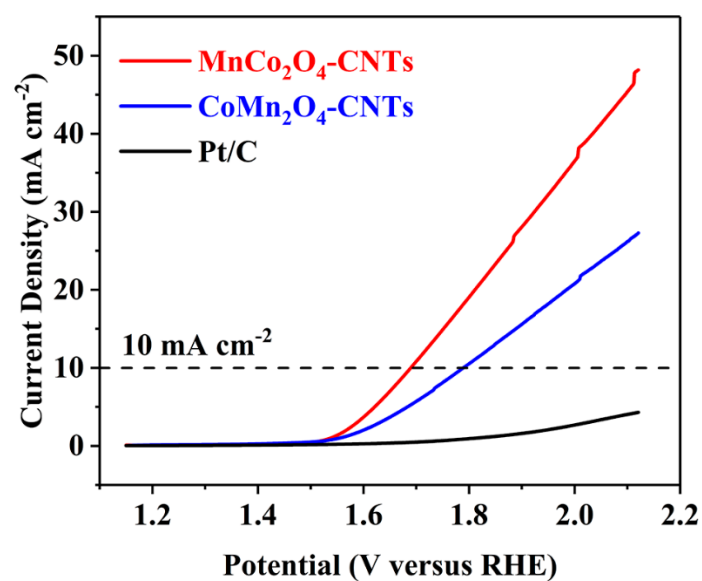

Figure S5. OER polarization curves of MnCo<sub>2</sub>O<sub>4</sub>-CNTs, CoMn<sub>2</sub>O<sub>4</sub>-CNTs and commercial Pt/C catalyst at the rotation of 1600 rpm.

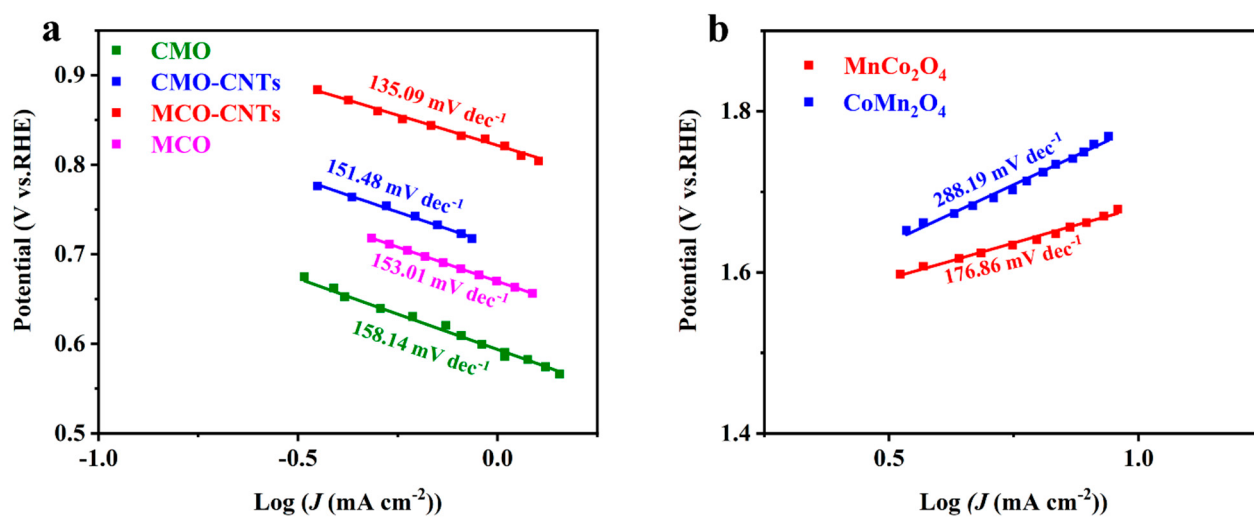

Figure S6. Corresponding Tafel slopes (a) Tafel slopes of ORR, and (b) Tafel slopes of OER.
